# Supplementary material for: Study of municipal solid waste treatment using plasma gasification by application of Aspen Plus
Source: publisher site journal article supplement (doi:10.1515/cppm-2024-0053), 2024-11-12
Supplement: Supplementary file 1 [file j_cppm-2024-0053_suppl_001.docx]

**Supplementary Information**

**Study of Municipal Solid Waste treatment using Plasma Gasification by application of Aspen Plus**


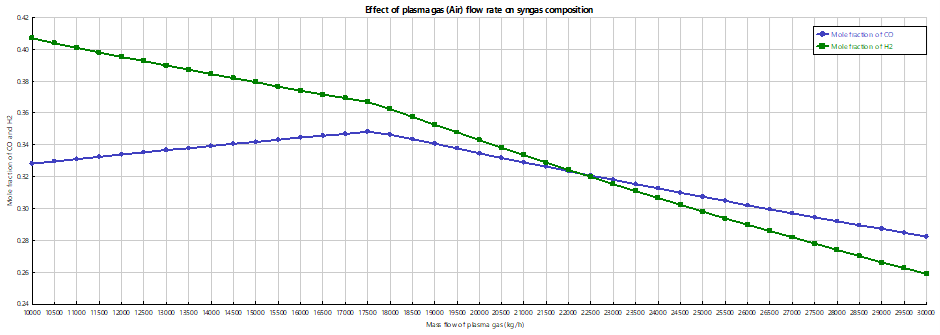


Fig.S1. Effect of plasma gas (Air) flow rate on syngas composition


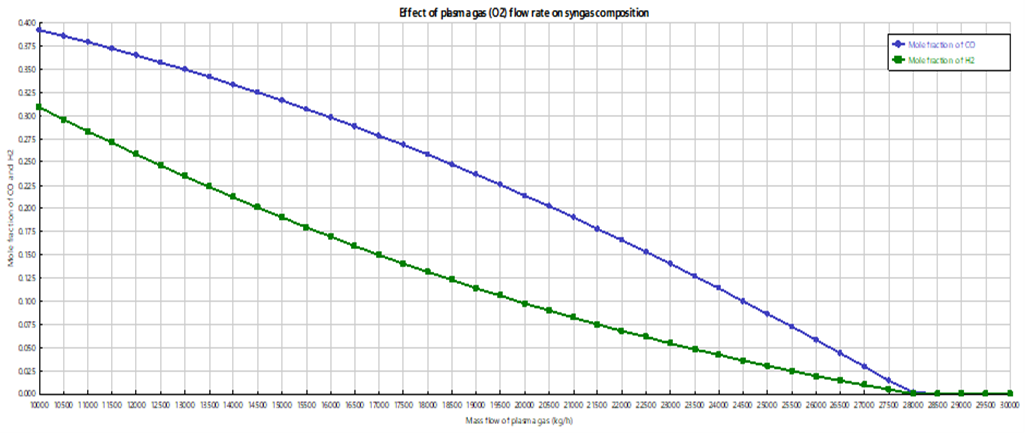


Fig.S2. Effect of plasma gas (O2) flow rate on syngas composition


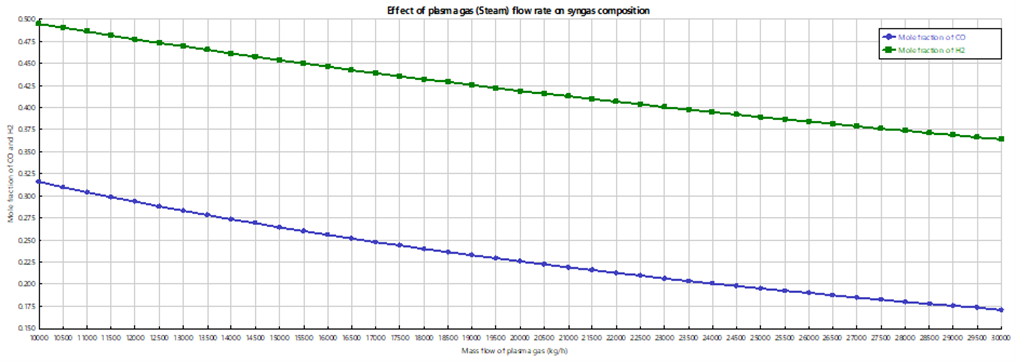


Fig.S3. Effect of plasma gas (Steam) flow rate on syngas composition


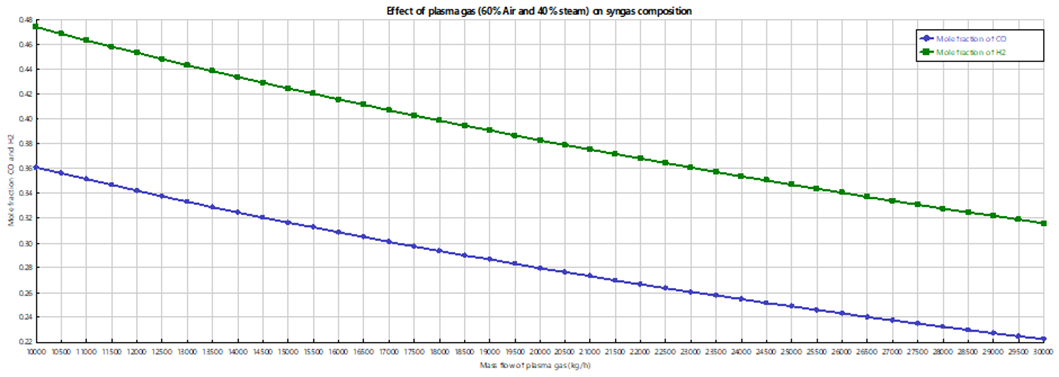


Fig.S4. Effect of plasma gas (60% Air + 40% Steam) flow rate on syngas composition


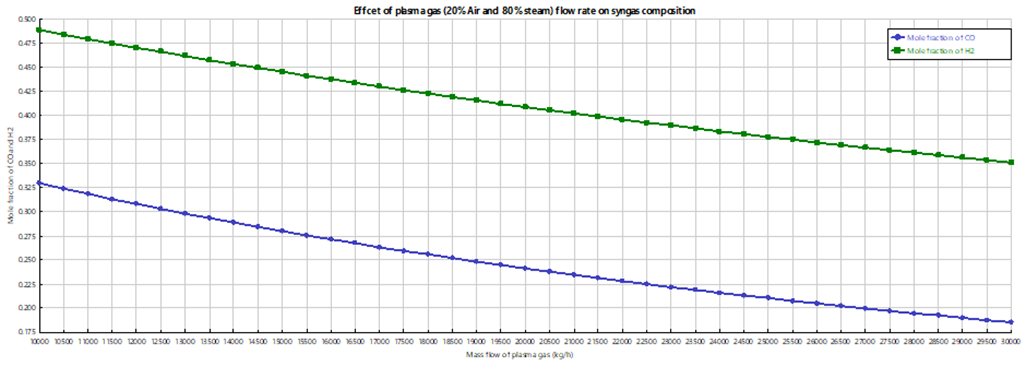


Fig.S5. Effect of plasma gas (20% Air + 80% Steam) flow rate on syngas composition


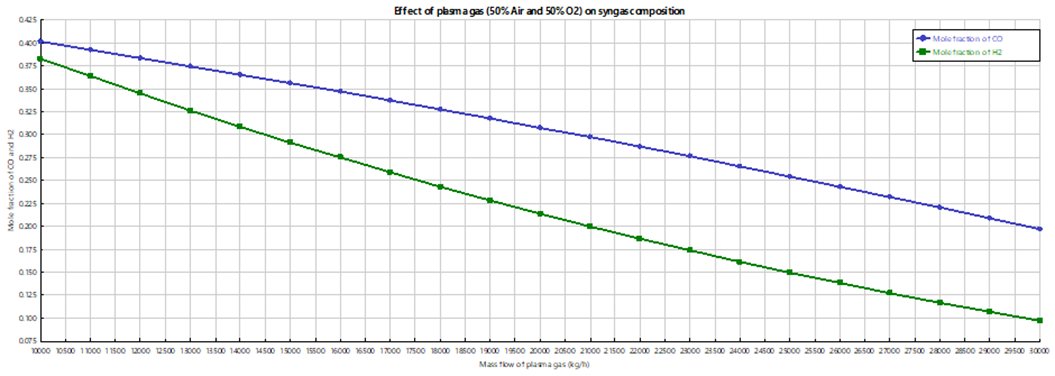


Fig.S6. Effect of plasma gas (50% Air + 50% Oxygen) flow rate on syngas composition


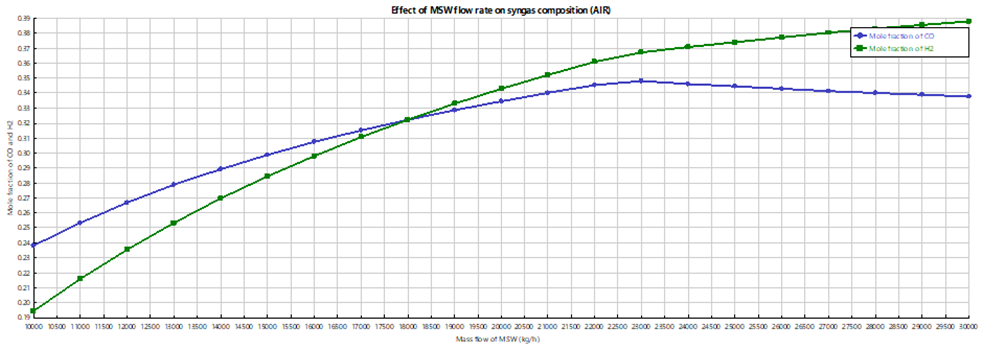


Fig.S7. Effect of MSW flow rate on syngas composition (Air)


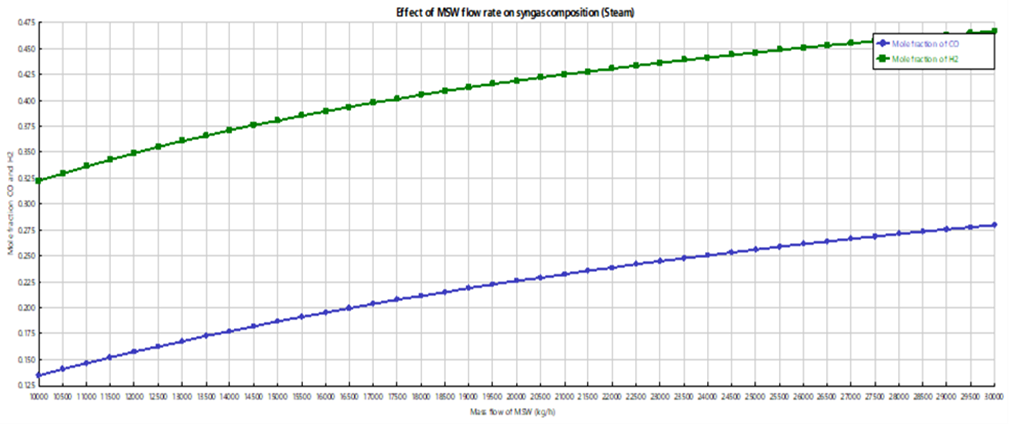


Fig.S8. Effect of MSW flow rate on syngas composition (Steam)


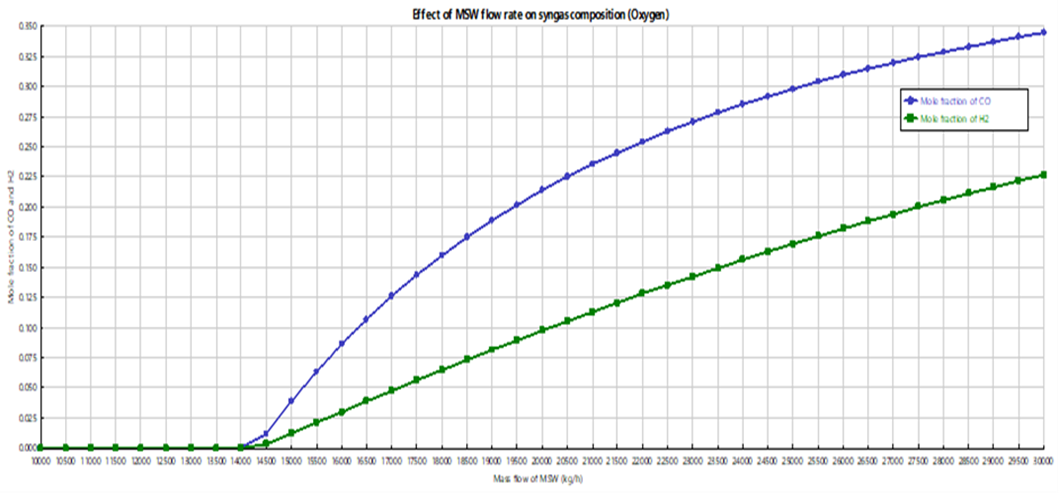


Fig.S9. Effect of MSW flow rate on syngas composition (oxygen)


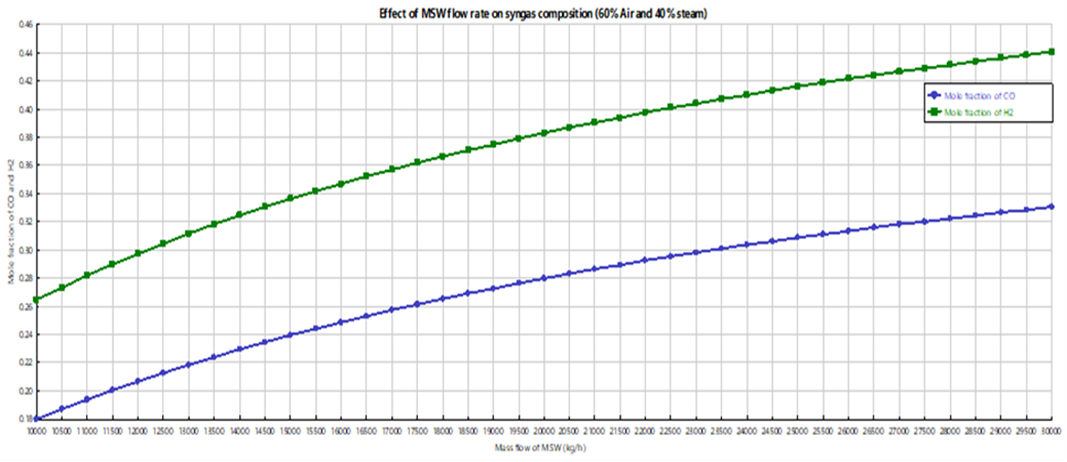


Fig.S10. Effect of MSW flow rate on syngas composition (60% Air + 40% steam)


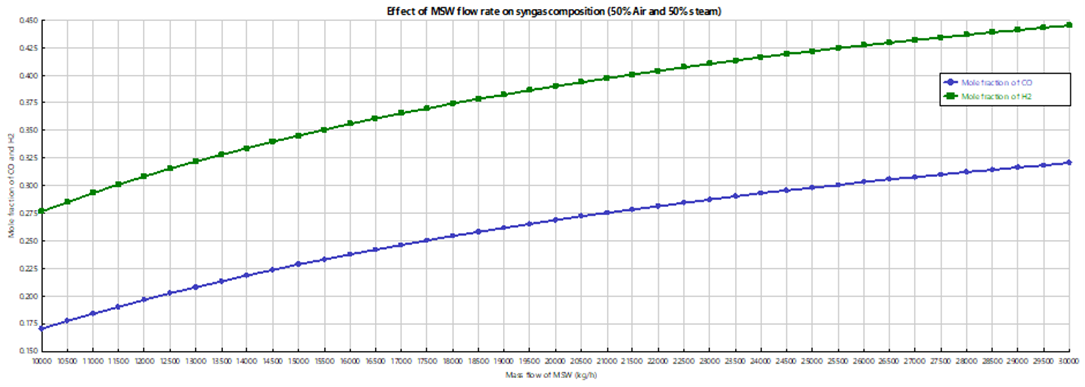


Fig.S11. Effect of MSW flow rate on syngas composition (50% Air + 50% steam)


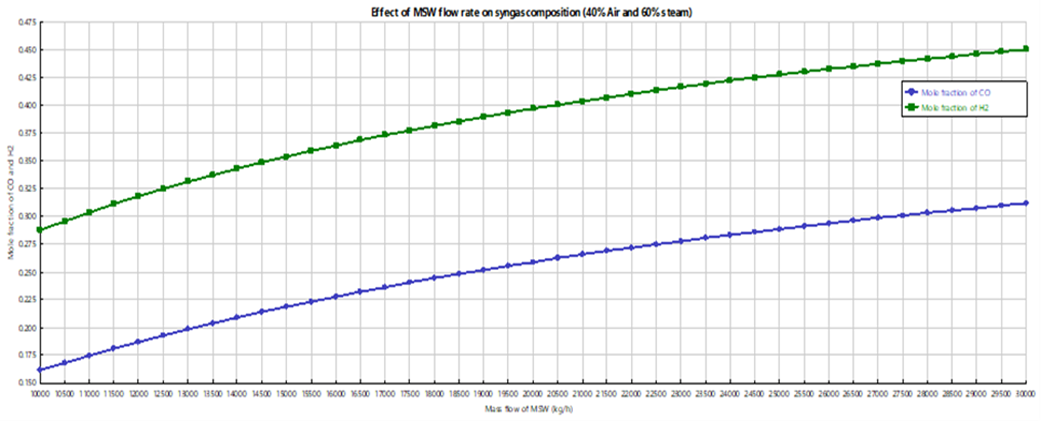


Fig.S12. Effect of MSW flow rate on syngas composition (40% Air + 60% steam)


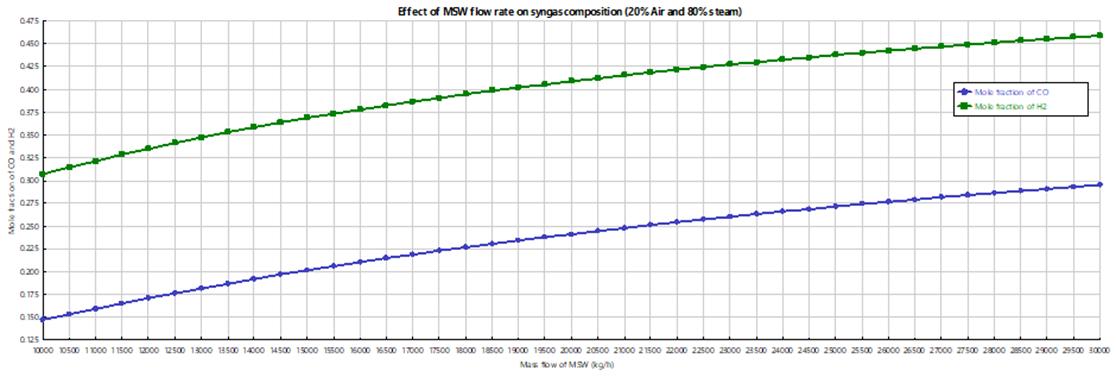


Fig.S13. Effect of MSW flow rate on syngas composition (20% Air + 80% steam)

**
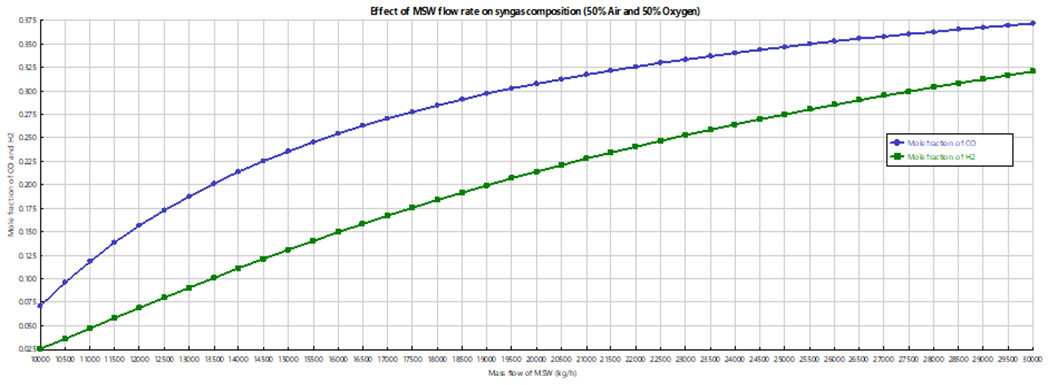
**

Fig.S14. Effect of MSW flow rate on syngas composition (50% Air + 50% Oxygen)
